# Supplementary material for: Lipid and ganglioside alterations in tumor cells treated with antimitotic oleyl glycoside
Source: Royal Society of Chemistry journal article supplement (doi:10.1039/c0mb00125b), 2010-11-05
Supplement: c0mb00125b.pdf [file c0mb00125b.pdf]

## Electronic Supplementary Information

### Tumoral Cell Lipid and Ganglioside Downregulation by Treatment with Antimitotic Oleyl Glycoside

Isabel García-Álvarez,<sup>c</sup> Meritxell Egido-Gabás,<sup>b</sup> Lorenzo Romero-Ramírez,<sup>cd</sup> Ernesto Doncel-Pérez,<sup>c</sup> Manuel Nieto-Sampedro,<sup>cd</sup> Josefina Casas<sup>\*b</sup> and Alfonso Fernández-Mayoralas<sup>\*a</sup>

## Electronic Supplementary Information

Antiproliferative activity of compound **1**. S2

Ceramide, sphingomyelin and glucosylceramide content in A549 cells as a function of the acyl chain length and the number of insaturations. S3

Lactosylceramide and ganglioside content in A549 cells as a function of the acyl chain length and the number of insaturations. S4

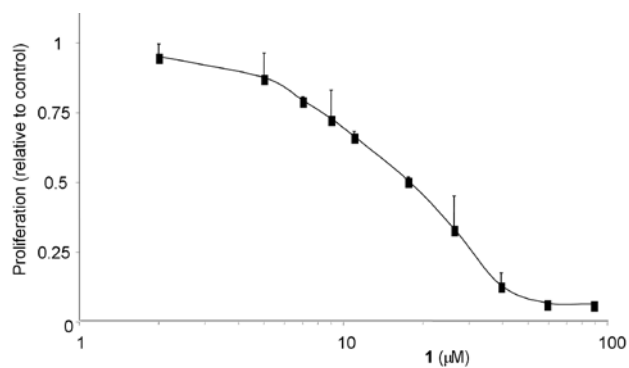

Figure 1S. Antiproliferative activity of compound **1**. A549 cells were seeded at 25000 cells per well in 96-well plates. Media were renewed after 24 h and cells were cultured in media containing 10% FBS, in the presence of different concentrations of compound **1**. Two days later, the number of viable cells was determined with the MTT test. Data are mean  $\pm$  SD of two experiments performed in triplicate.

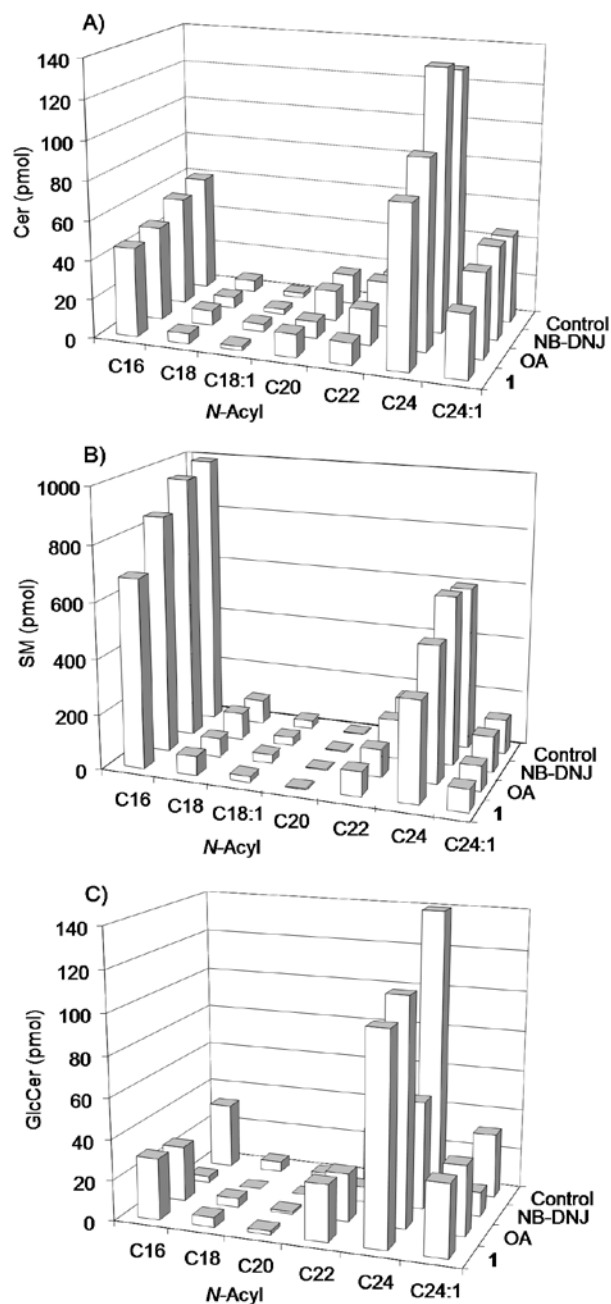

Figure S2. Effect of 1, NB-DNJ and oleic acid on ceramide (Cer), sphingomyelin (SM) and glucosylceramide (GlcCer) content of A549 carcinoma cells. Data were normalized to the same number of cells ( $1 \times 10^6$  cells). A549 cells were seeded at 250 000 cells per well in 6-well plates. The medium was renewed after 24 h and cells were cultured in medium containing 10% FBS, in the presence of compound 1 (10  $\mu$ M), NB-DNJ (50  $\mu$ M), oleic acid (10  $\mu$ M) or ethanol (1  $\mu$ L). Two days later, the cells were extracted and analyzed as described in the experimental section. The data are the mean of two experiments performed by triplicate.

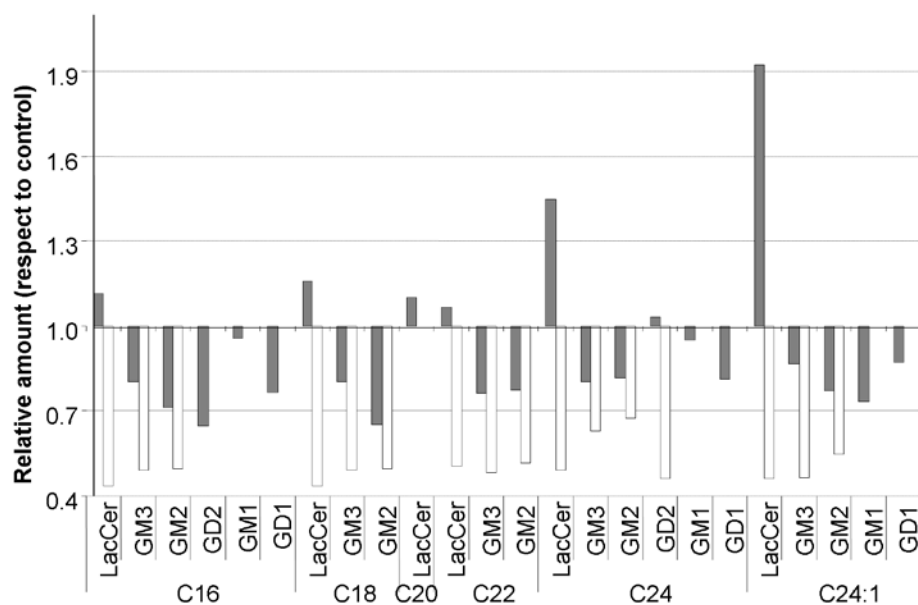

Figure S3. Effect of compound 1 and NB-DNJ on the lactosylceramide (LacCer) and ganglioside content of A549 carcinoma cells. The data were normalized to the same number of cells ( $1 \times 10^6$  cells). Results are referred to samples from cells treated with vehicle for 48 h. Black bars: A549 cells treated with 1 ( $10 \mu\text{M}$ ); open bars: A549 cells treated with NB-DNJ ( $50 \mu\text{M}$ ). \*: ganglioside not detected in the extracts of cells incubated with NB-DNJ.
